# Supplementary figures and images for: Bacterial Community Characteristics in the Gastrointestinal Tract of Yak (Bos grunniens) Fully Grazed on Pasture of the Qinghai-Tibetan Plateau of China
Source: MDPI journal article supplement (doi:10.3390/ani11082243), 2021-07-30

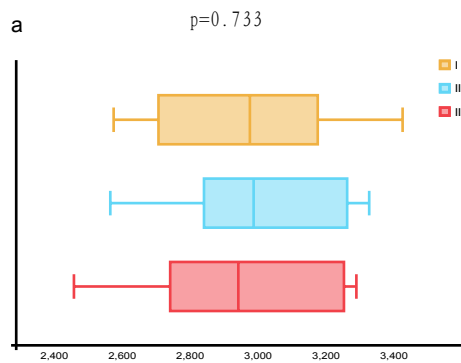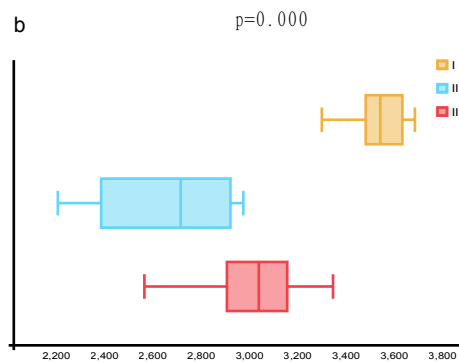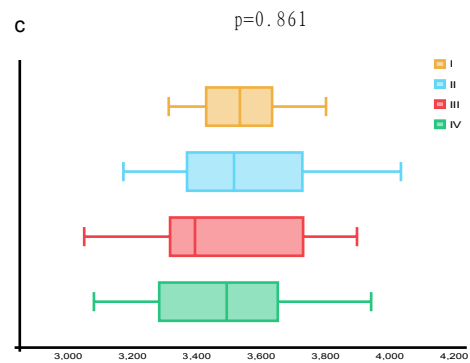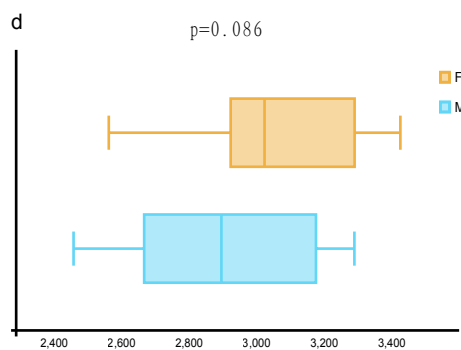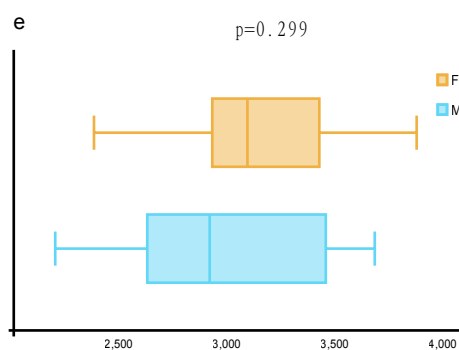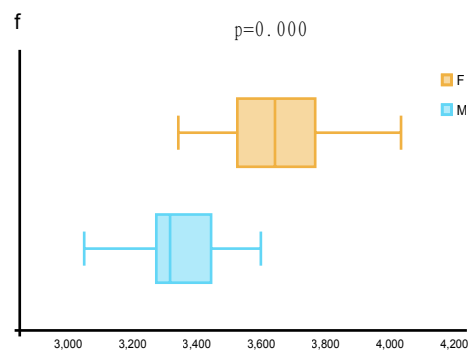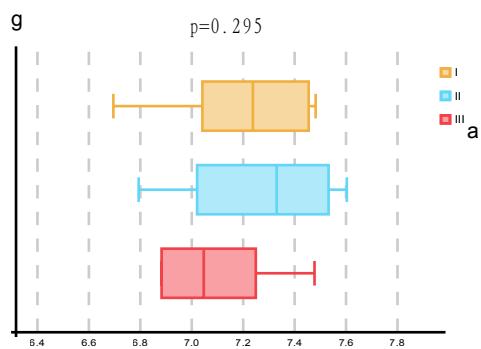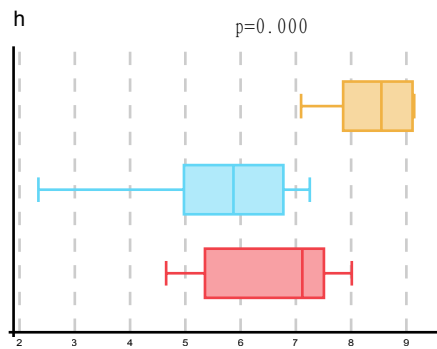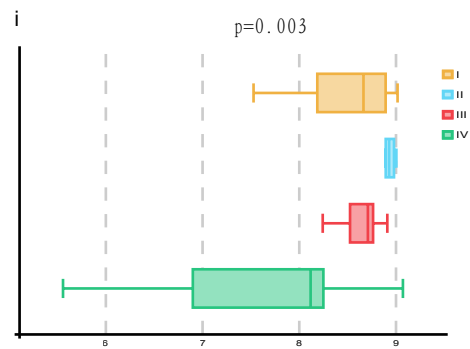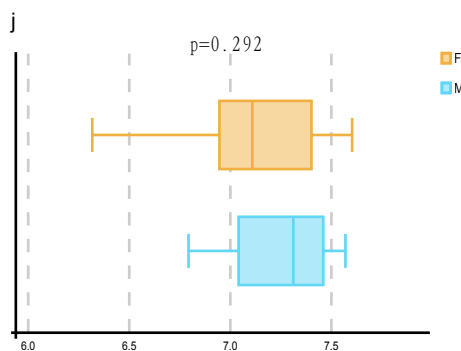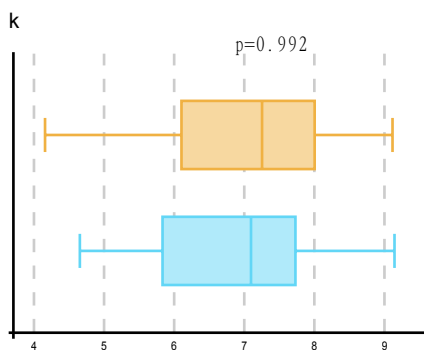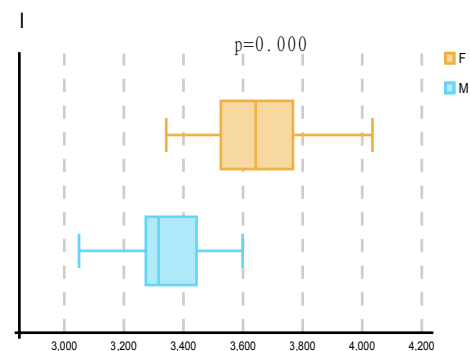

Supplement: s1 [file s1]
